# Supplementary material for: Left ventricle dysfunction in patients with critical neonatal pulmonary stenosis: echocardiographic predictors. A single-center retrospective study
Source: PeerJ. 2022 Dec 21;10:e14056. doi: 10.7717/peerj.14056 (PMC9789691; doi:10.7717/peerj.14056)
Supplement: Supplemental Information 1 [file peerj-10-14056-s001.xlsx]

## Sheet: Foglio1
Code	Sex	Date of birth	LV Dysfunction	Height cm	Diagnosis	Pulmonary Regurgitation	LVED pre mm	LVED post mm	RVD AREA cm2 pre	RVD AREA cm2 post	sinusoids	Right Ventricle anatomic component	Z-score tricuspide	Strain Long Right Ventricle %	Tricuspid Regurgitation Grade	Right Ventricle Pressure Gradiente mmHg	Systolic Pressurex Cat mmHg	Right and Left Ventricle Pressure Ratio pre	Right and Left Ventricle Pressure Ratio post	Days from birth to procedure	LVEF pre %	LVEF post %	Days for recovery of EF	LVED after LVEF recovery %	RVD AREA after LVEF recovery %	LVOT obstruction	LV Mass	Global LV Strain long Pre %	BIS pre	MIS	AIS	AAL	MAL	BAL	LV Strain long Post %	BIS	MIS	AIS	AAL	MAL	BAL	Strain long after LVEF recovery %	BIS	MIS	AIS	AAL	MAL	BAL	Dyastolic Strain 1
PVS1	1	2015-08-04	1	47	APSI	3	8.6	9.7	1.2	1.2	1	2	-3.2	-23	1	68	58	1.1	0.8	2	60	42	20	12.5	1.9	0	8.5	-13.1	-10	-12	-37	-9.8	-22.3	-15	-9.6	-6.4	-6.2	-9.2	-13	-28.7	-9.8	-15.7	-23	-7.3	-17.2	-4.6	-20.5	-23.9	200
PVS2	1	2016-06-09	1	49	SVP critica	3	8.6	8	2.6	2.5	1	3	-1	-16.8	1	120	46	2.6	1	1	68	45	40	9.2	2.6	0	11.5	-15.4	-9.3	-19	-43	-30	-15.8	-6	-10.2	-7.8	-8	-6.7	-16.8	-12.6	-13.6	-15							210
PVS3	1	2016-08-31	1	48	SVP critica	3	7.9	5.1	2.6	3.3	0	3	-0.3	-18.6	2	114	65	1.7	0.7	1	72	49	6	5.1	2.4	0	16	-14.1	-10.6	-11	-21.8	-14.7	-22.2	-12.1	-11.3	-8.5	-7	-20	-118	-21	-14	-14.1							270
PVS4	1	2017-02-27	1	44	SVP critica	3	5.4	5.2	3	3.4	2	3	-2	-14.7	1	100	52	1.9	1	2	65	30	120	9	4.9	1	12.5	-13.3	-9.4	-18.6	-25.8	-29.5	-9.2	-7	-5.7	-5.5	-8.2	-9.8	-4.4	-5.9	-6.9	-11.6	-3.9	-13.3	-13.5	-9.5	-10.1	-18.3	270
PVS5	1	2015-09-16	1	50	APSI	3	7.5	5.4	2.6	2.7	0	3	0.73	-17.2	2	150	68	2.2	0.8	5	61	31	13	6.1	2.4	0	12	-10.6	-7.4	-3	-24.6	-10.3	-20.8	-7.9	-10.4	-4	-8	-23	-20	-11.7	-2.6	-17.3	-27.4	-25.6	-14.4	-7	-11.1	-23.5	260
PVS6	1	2015-09-07	1	50	APSI	3	6	6	2.1	2.4	1	2	0.38	-18.5	2	80	65	1.2	1	3	60	48	15	6.8	2.9	0	12.4	-14.5	-13.6	-28.7	-5.8	-26.4	-4.2	-14.8								-22.4	-20.8	-39.8	-11.6	-24.8	-22.6	-28.3	290
PVS7	2	2016-08-22	1	43	SVP critica	2	3.4	3.2	3.3	2.4	0	3	0.5	13.5	3	120	60	2	1	1	62	40	20	6.2	3.1	1	12.7	-14.9	-13.7	-3.6	-20.2	-24.2	-22.1	-11.8	-13.7	-10.9	-4	-20.1	-27	-15.3	-4.8	-19.1	-27.5	-21.5	-10.8	-10.7	-27.5	-26.8	210
PVS8	2	2015-06-08	1	50	SVP severa	3	6.6	5.4	2.5	2.6	0	3	-0.83	-15.8	1	86	67	1.5	0.7	1	67	45	7	6.6	3.5	0	12.9	-17.2	-13.3	-13.6	-20.5	-26.3	-14.6	-27.8	-11.3	-10.3	-12	-14	-10	-18	-15	-6.6	-13	-29.9	-10.5	-18.2	-10.6	-29.6	270
PVS9	2	2015-12-20	2	50	SVP critica	1	6.8	7.6	2.3	2.7	0	3	-1.3	-14	3	120	60	2	0.8	4	70	65				0		-17.1	-11.6	-12.7	-46.4	-29.2	-15.4	-6.9															340
PVS10	1	2016-04-26	2	50	SVP severa	1	3.6	4	3.2	3.4	0	3	1	-12	1	90	56	1.6	0.7	6	66	60				0	10	-15.5	-11.5	-12	-28	-26.5	-16	-7															240
PVS11	2	2015-04-10	2	48	SVP critica	2	4.8	5.4	2.2	2.4	0	2	1	-14	3	114	60	1.9	1	1	70	65				0	8.74	-16	-12	-14	-28	-27	-15.5	-10															250
PVS12	1	2015-11-25	2	49	SVP critica	2	2.8	3.9	2.8	2.4	2	3	-1	-16	1	115	60	1.9	1	1	68	65				0	13.4	-15.6	-11.3	-16.6	-26.4	-27.3	-15.1	-11.3															220
PVS13	1	2015-11-10	2	50	SVP critica	2	3.8	3.4	3.4	3.4	1	3	-0.39	-13	3	80	64	1.2		2	61	62				0	11.9	-16	-5	-10.8	-29.7	-47	-11.7	-9.3															280
PVS14	1	2016-06-24	2	50	APSI	2	3.7	5.4	5.1	4.9	1	3	-0.38	-13.2	3	95	54	1.7		4	60	58				1	10	-15.7	-13	-10	-29	-30	-12	-12															223
PVS15	1	2015-10-30	2	47	SVP severa	2	5.4	4.3	2.4	1.7	0	3	1.2	-10	1	70	55	1.3		4	61	60				0	14.7	-15.9	-12.2	-19.7	-37.2	-33	-15	-8															290
PVS16	2	2014-12-03	2	50	SVP critica	1	6.9	8.5	2.8	2.6	0	3	1.1	-12	2	124	60	2	1	1	60	57				0	14.6	-16.3	-6.1	-24.9	-28.6	-21.8	-11.7	-19.9															290
PVS17	1	2014-09-04	2	45	SVP severa	1	3.8	3.7	2.6	2.8	0	3	1.2	-16	1	100	65	1.5		2	63	61				0	10.6	-15.4	-7.3	-13	-35.5	-24.5	-18.8	-4
PVS18	1	2014-12-12	2	53	SVP critica	1	9	8.1	4.4	4	1	3	-0.7	-16	2	109	66	1.6	0.8	2	64	65				0	15.6	-20	-18.6	-13.9	-41.1	-40	-12	-20
PVS19	1	2012-08-24	2	49	SVP critica	2	4	5	3.7	3.9	0	3	-0.6	-18	1	70	48	1.4	0.8	3	58	60				0	14.5	-15.3	-4.8	-22.6	-35	-2	-29.5	-6.5
PVS20	1	2012-10-20	2	49	SVP	2	7.6	7.7	4.1	4.3	0	3	-1.1	-18.3	1	107	62	1.7	0.7	3	68	65				0	12	-16.4	-4.6	-10.3	-39.4	-22.3	-9.8	-24.8
PVS21	1	2015-10-14	2	51	SVP	2	3	2.2	2.4	3.2	0	3	-2.4	-17.6	1	160	73	2.1	0.9	2	65	63				0	13	-13.4	-8.9	-17	-21.9	-20.5	-15.3	-6.2
PVS22	2	2013-09-27	2	44	SVP	2	4.9	4.3	2.7	2.3	0	3	-2.3	-19	3	67	61	1.1		1	60	58				0	10.5	-14	-10	-21	-29	-8	-12.2	-10
PVS23	2	2013-08-01	2	44	SVP critica	2	3.9	4.2	2	2.6	0	3	-2.3	-16.5	3	85	51	1.7	0.8	1	62	60				0	10.5	-15	-11	-15.3	-29	-28	-13	-11
PVS24	1	2013-03-20	2	55	SVP severa	2	9.4	9.8	4.1	4.4	0	3	1.4	-18	1	115	110	1		30	65	66				0	10.4	-16	-12.1	-16.3	-30	-29	-14	-12
PVS25	1	2012-12-23	2	50	SVP severa	2	5.4	8.5	3.8	3.8	0	3	0.45	-15	1	80	90			11	67	65				0	9	-15.3	-13	-18	-24	-22.3	-12	-11.5
PVS26	1	2017-12-07	2	51	SVP severa	1	4.1	4.4	3.4	3.8	0	3	-1.5		1	66	60	1.1	0.6	6	66	64				0	18	-13	-9	-21.5	-33.3	-21.9	-3	-7.3
PVS27	1	2019-12-06	2	50	SVP severa	1	7.9	9.7	5.2	4.2	0	3	-2.4	-16	1	49	58	0.8	0.6	13	65	63				0	17	-12	-11	-17	-30	-28	-11	-12
PVS28	1	2018-06-21	2	48	SVP severa	1	4.3	6.2	2.9	3.2	0	3	-0.6	-12	1	113	66	1.7	1.1	10	60	62				0	13	-15.4	-10.8	-13	-19.3	-16.9	-10.1	-25.3
PVS29	2	2018-09-07	2	48	SVP severa	1	9.4	7	3.4	3.5	0	3	-1.2		1	75	65	1.1	0.5	30	67	65				0		-16.1	-20.7	-12.1	-22.7	-25.1	-10.3	-12.5
			1: yes 2: no
															Mild 1, Mod 2, Sev 3											no: 0, mild: 1			BIS Basal Interventriculare Septum	MIS Medium Interventricular Septum	AIS Apicale Interventricular Septum	AAL Apical Antero-Lateral Wall	MAL Medium Antero-Lateral Wall	BAL Basal Antero-Lateral Wall
						Mild 1	LVED Left Ventricle End Diastolic Diameter			RVD Right Ventricle Diastolic		1: monopartite2: bipartite 3: tripartite
						Moderate 2
						Severe 3
[truncated: 3 more columns]
